# Supplementary material
Source: publisher figshare collection journal article supplement (https://acs.figshare.com/ndownloader/files/5922165)
Supplement: Supplementary file 1 [file 5922165]

## **Supporting Information for:**

# **Protein Adsorption and Reorganization on Nanoparticles Probed by the Coffee-Ring Effect: Application to Single Point Mutation Detection**

Stéphanie Devineau,<sup>1,2,†</sup> Manos Anyfantakis,<sup>1,2</sup> Laurent Marichal,<sup>3</sup> Laurent Kiger,<sup>4</sup> Mathieu Morel,<sup>1,2</sup> Sergii Rudiuk,<sup>1,2</sup> Damien Baigl<sup>1,2,\*</sup>

<sup>1</sup> Ecole normale supérieure, PSL Research University, UPMC Univ Paris 06, CNRS, Department of Chemistry, PASTEUR, 24, rue Lhomond, 75005 Paris, France

<sup>2</sup> Sorbonne Universités, UPMC Univ Paris 06, ENS, CNRS, PASTEUR, 75005 Paris, France

<sup>3</sup> LIONS, NIMBE, CEA, CNRS, Université Paris-Saclay, CEA Saclay, 91191 Gif sur Yvette, France

<sup>4</sup> IMRB-INSERM U955, 5 rue Gustave Eiffel, 94017 Creteil Cedex, France

\* Corresponding author:

Phone: +33 1 4432 2405; Email: [damien.baigl@ens.fr](mailto:damien.baigl@ens.fr);

## **Contents**

1. Additional drying patterns of PS particles with BSA
2. Drying patterns of pure protein solutions
3. Surface tension measurement
4. Adsorption isotherm of BSA as a function of the initial protein concentration
5. pH measurements
6. Additional drying patterns of PS particles with p-HbA
7. Ring factor analysis of drying patterns with p-HbA
8. Adsorption isotherm of myoglobin on PS-AMI particles
9. Adsorption isotherm of p-HbA as a function of the initial protein concentration

# 1. Additional drying patterns of PS particles with BSA

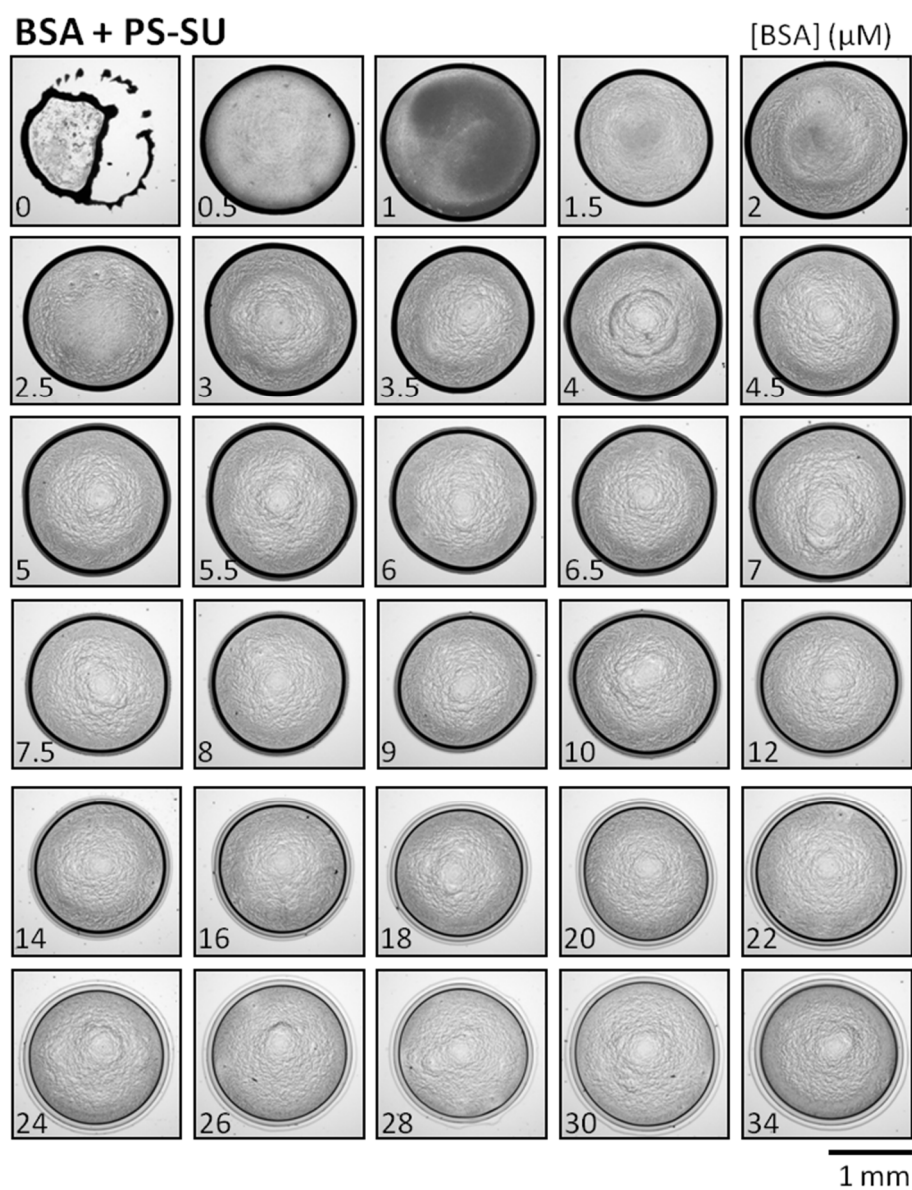

Figure S1. Brightfield microscope images of drying patterns of 0.8  $\mu\text{L}$  drops of PS-SU particle solutions at different concentrations of BSA ( $C_{\text{PS}} = 2 \text{ mg/mL}$ )

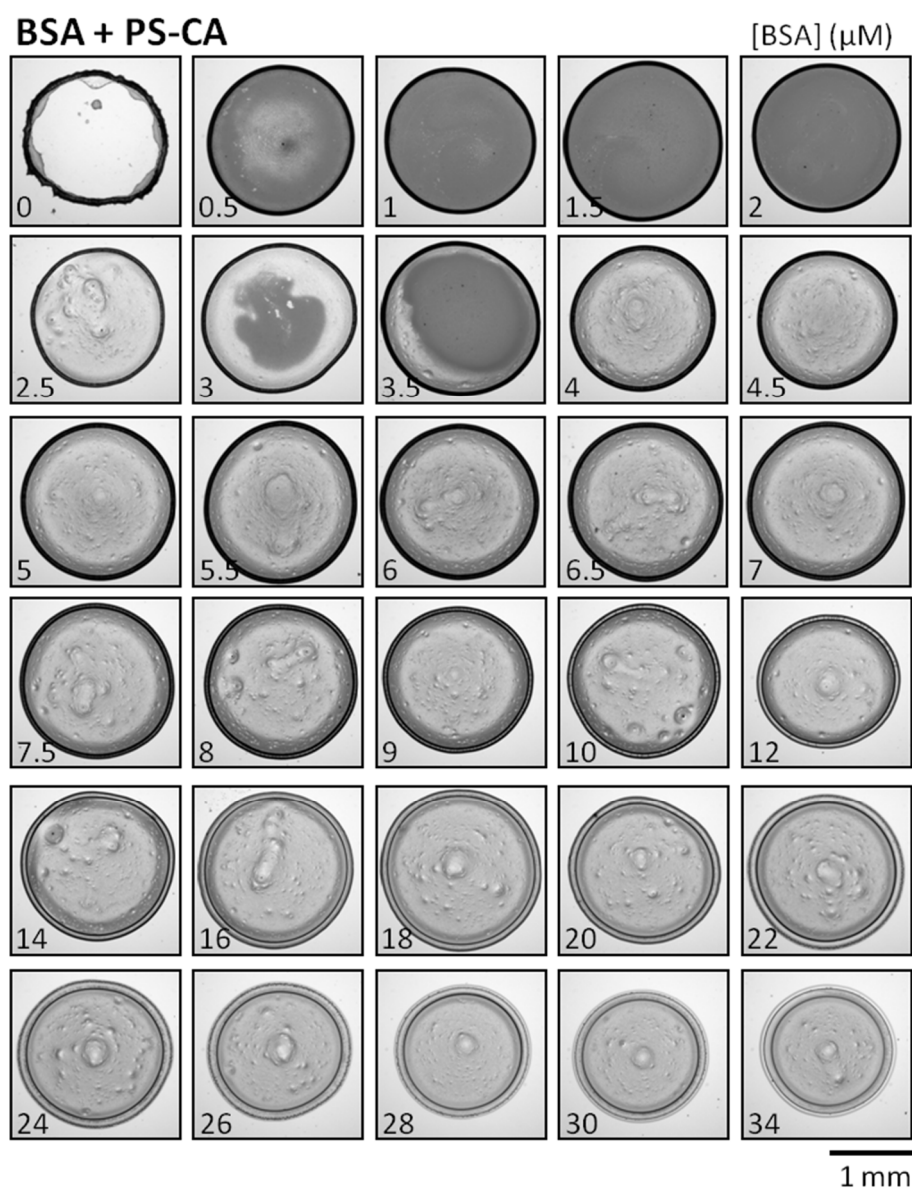

Figure S2. Brightfield microscope images of drying patterns of 0.8  $\mu\text{L}$  drops of PS-CA particle solutions at different concentrations of BSA ( $C_{\text{PS}} = 2 \text{ mg/mL}$ )

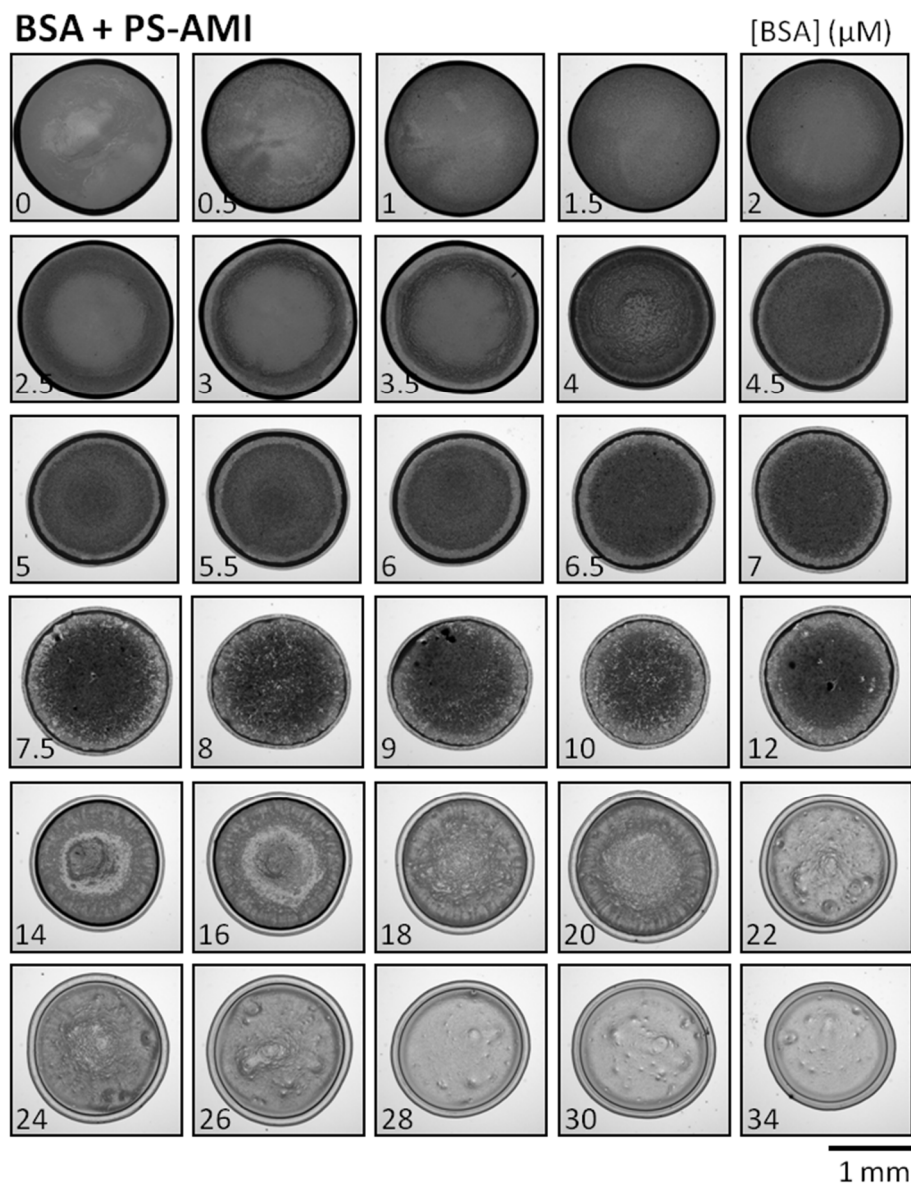

Figure S3. Brightfield microscope images of drying patterns of 0.8  $\mu\text{L}$  drops of PS-AMI particle solutions at different concentrations of BSA ( $C_{\text{PS}} = 2 \text{ mg/mL}$ )

## 2. Drying patterns of pure protein solutions

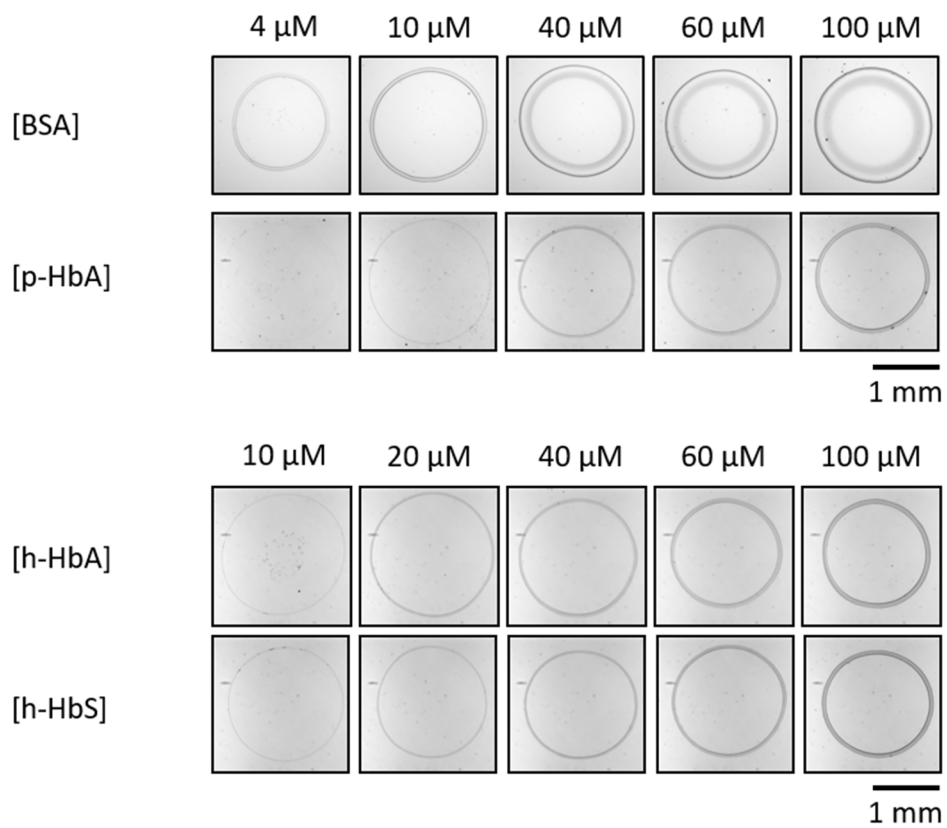

Figure S4. Brightfield microscope images of drying patterns of 0.8  $\mu\text{L}$  drops of pure protein solutions (BSA, p-HbA, h-HbA and h-HbS) at various protein concentrations

### 3. Surface tension measurement

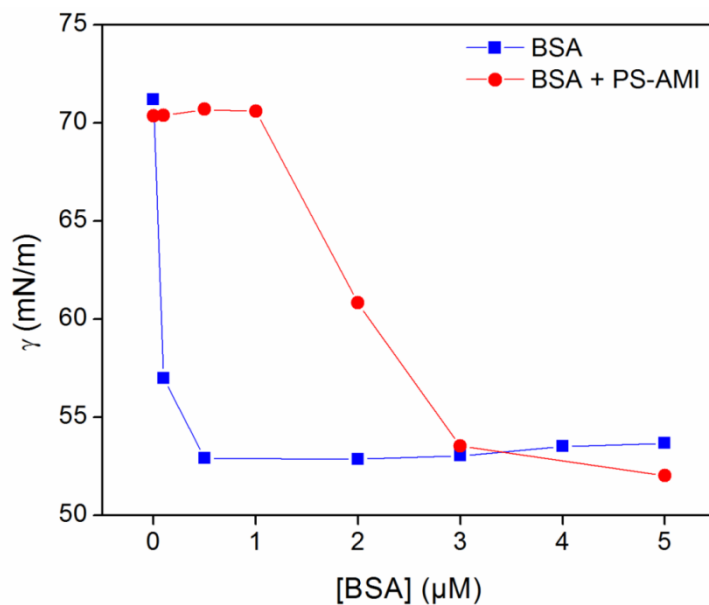

Figure S5. Surface tension of 10  $\mu\text{L}$  drops of BSA with (●) and without (■) PS-AMI particles ( $C_{\text{PS}} = 2$  mg/mL) as a function of BSA concentration

### 4. Adsorption isotherm of BSA as a function of the initial protein concentration

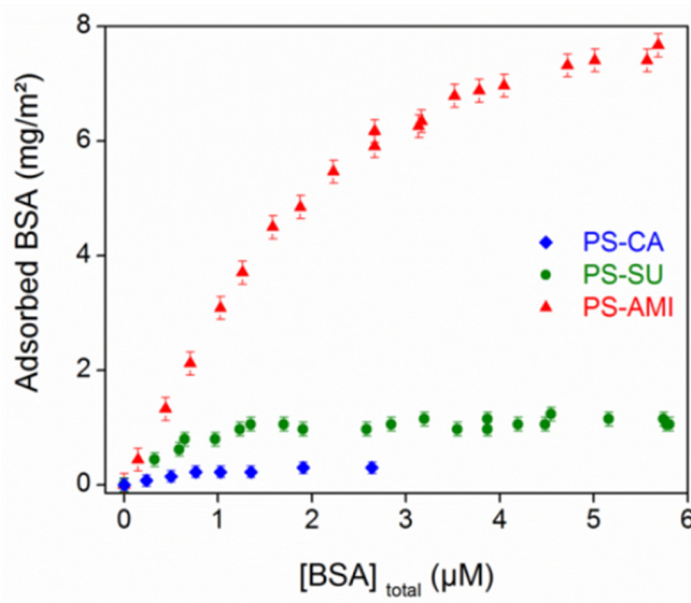

Figure S6. Adsorption isotherm of BSA on PS-CA (◆), PS-SU (●) and PS-AMI (▲) particles as a function of the initial BSA concentration.

## 5. pH measurements

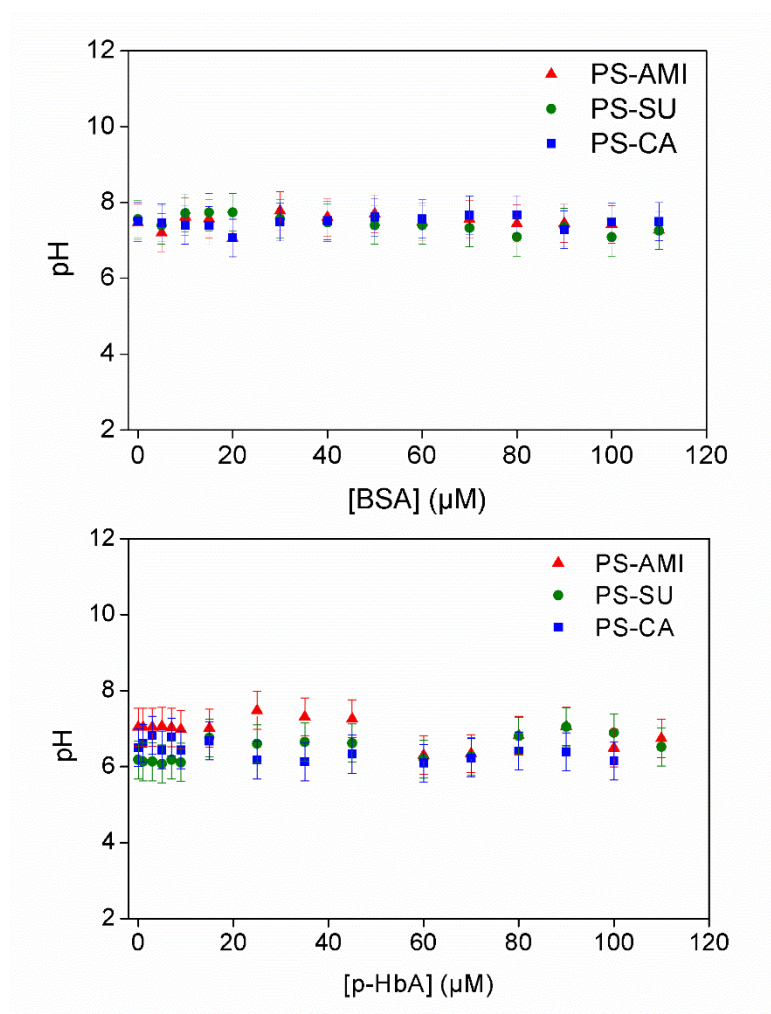

Figure S7. pH measurements of PS-CA (■), PS-SU (●) and PS-AMI (▲) particle solutions for an equivalent  $C_{\text{PS}} = 2 \text{ mg/mL}$  as a function of BSA and p-HbA concentration.

## 6. Additional drying patterns of PS particles with p-HbA

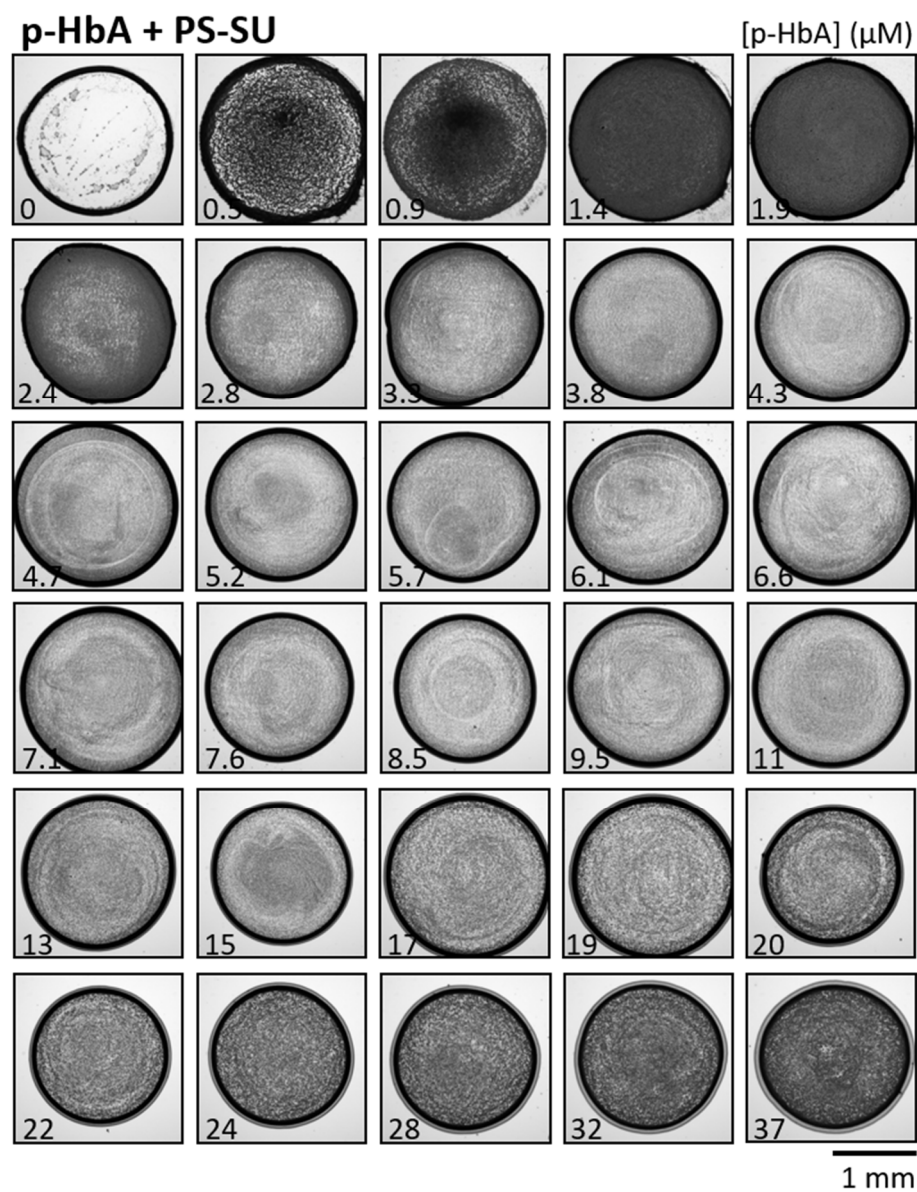

Figure S8. Brightfield microscope images of drying patterns of 0.8  $\mu\text{L}$  drops of PS-SU particle solutions at different concentrations of p-HbA ( $C_{\text{PS}} = 2 \text{ mg/mL}$ )



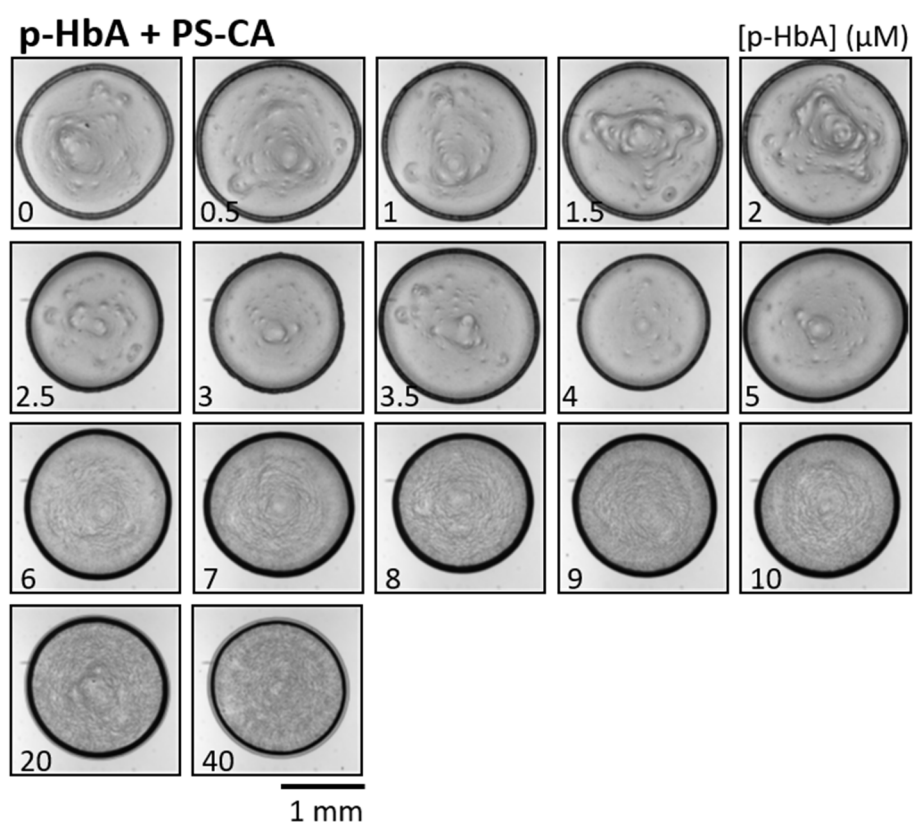

Figure S9. Brightfield microscope images of drying patterns of 0.8  $\mu\text{L}$  drops of PS-CA particle solutions at different concentrations of p-HbA ( $C_{\text{PS}} = 2 \text{ mg/mL}$ )

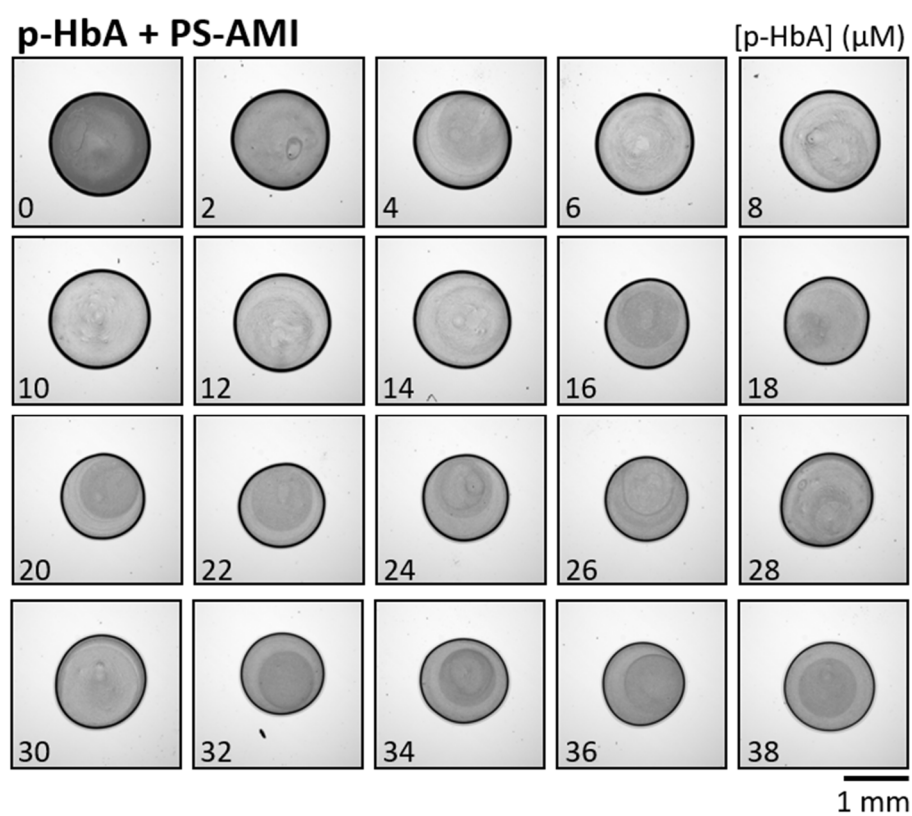

Figure S10. Brightfield microscope images of drying patterns of 0.8  $\mu\text{L}$  drops of PS-AMI particle solutions at different concentrations of p-HbA ( $C_{\text{PS}} = 2 \text{ mg/mL}$ )

## 7. Ring factor analysis of drying patterns with p-HbA

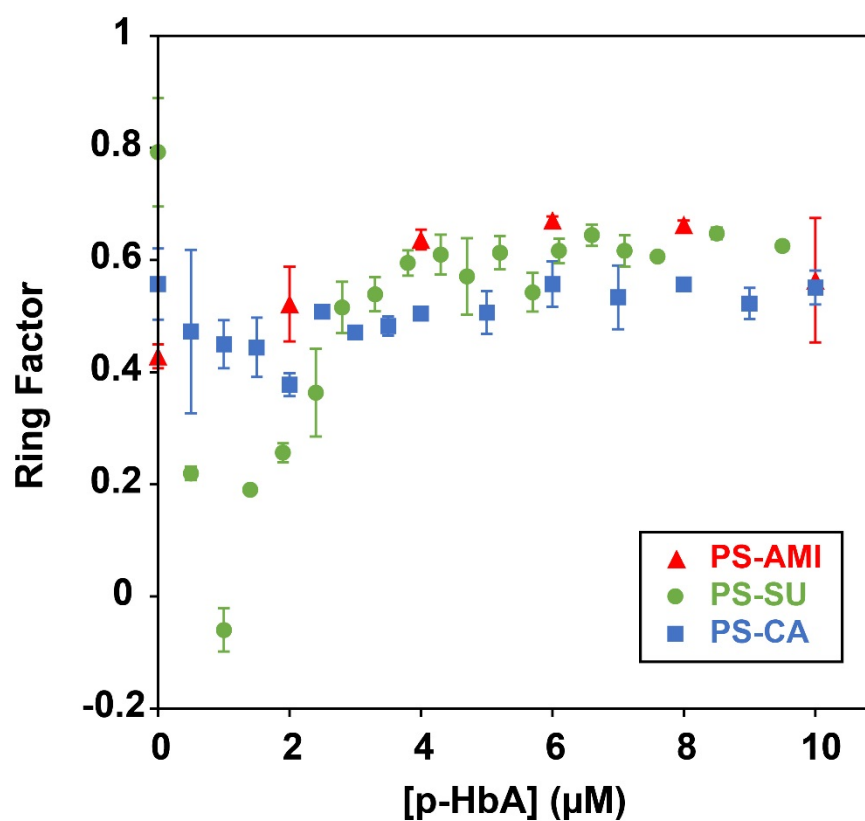

Figure S11. Ring factor ( $RF$ ) evolution as a function of p-HbA concentration.  $RF$  was calculated by image analysis of the patterns obtained with PS-AMI (red triangles), PS-SU (green disks) and PS-CA (blue squares) particles ( $C_{\text{PS}} = 2 \text{ mg/mL}$ ). Error bars correspond to mean  $\pm$  std on triplicates.

## 8. Adsorption isotherm of myoglobin on PS-AMI particles

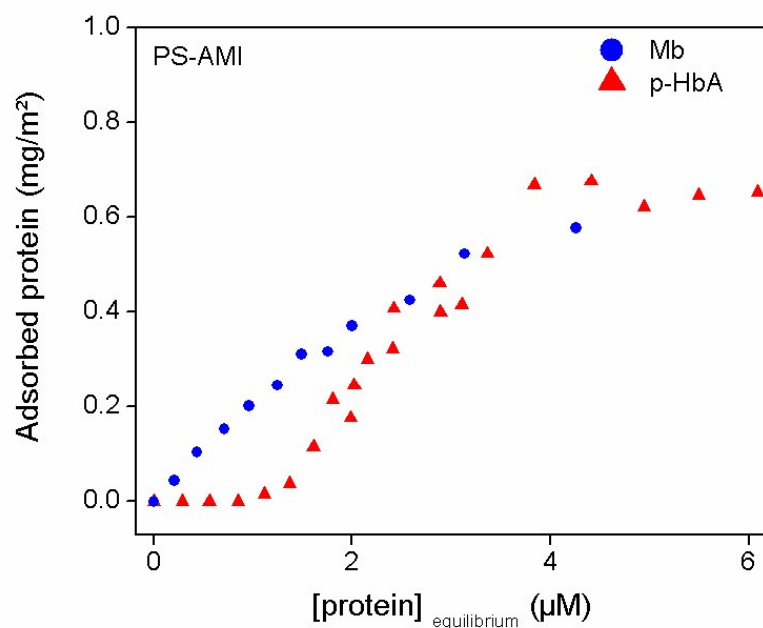

Figure S12. Adsorption isotherm of Mb (●) and p-HbA (▲) on PS-AMI particles ( $C_{PS} = 2$  mg/mL)

## 9. Adsorption isotherm of p-HbA as a function of the initial protein concentration

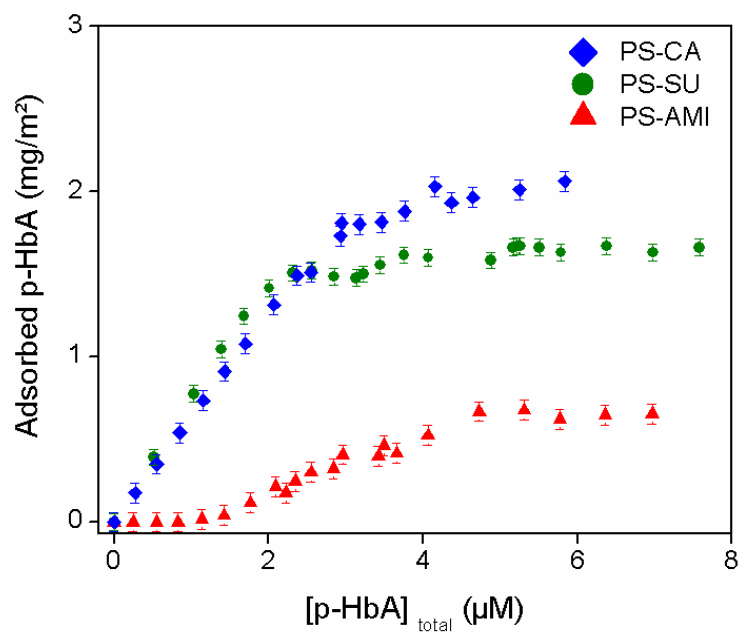

Figure S13. Adsorption isotherm of p-HbA on PS-CA (◆), PS-SU (●) and PS-AMI (▲) particles as a function of initial BSA concentration.
